# Supplementary material for: Internet. Comunicación en ambas direcciones
Source: Royal Society of Chemistry journal article supplement (doi:10.1039/d3dt02716c), 2002-01-01
Supplement: d3dt02716c1.pdf [file d3dt02716c1.pdf]

**Narrow band dazzling red emitting (LiCaLa(MoO<sub>4</sub>)<sub>3</sub>:Eu<sup>3+</sup>) phosphor with scheelite structure for Hybrid White LEDs and LiCaLa(MoO<sub>4</sub>)<sub>3</sub>:Sm<sup>3+</sup>, Eu<sup>3+</sup> Based Deep-Red LEDs for Plant Growth Applications**

Priyansha Sharma<sup>a</sup>, Jayaprakash Madda<sup>a</sup> and Sivakumar Vaidyanathan<sup>b\*</sup>

<sup>a</sup> Department of Chemistry, National Institute of Technology Rourkela - 769 008, Odisha, India.

<sup>b</sup> Department of Chemistry, Indian Institute of Technology Hyderabad, Sangareddy, Kandi, Telangana 502285, India.

---

\*To whom correspondence should be addressed. Email: [vsiva@chy.iith.ac.in](mailto:vsiva@chy.iith.ac.in) (Sivakumar Vaidyanathan).

## Characterization

The phase formation and purity of the phosphors were analyzed using a powder X-ray diffractometer (RIGAKU, JAPAN & ULTIMA -IV) which utilizes Cu-K $\alpha$ 1 radiation to generate X-rays. The SEM images were taken by a JEOL JSM 6480LV scanning electron microscope. The FTIR was carried out in the range of 400 - 4000 cm<sup>-1</sup> by Perkin Elmer IRL 1600300. The PL (excitation and emission) spectra and lifetime were monitored by using Edinburg Spectrofluorometer FS-5 instruments with attaching SC-10 and SC-30 integrating sphere modules. A pulsed xenon lamp was used as the excitation source, and the signals were detected with a photomultiplier. Temperature-dependent PL spectra were measured by using Horiba Jobin-Yvon Fluorolog 3-221 spectrofluorometer having a 450W xenon lamp equipped with Janis Cryostat VPF-800. Quantum yield was measured with the attached integrating sphere. The Commission International de'Eclairage (CIE) color coordinates were calculated from CIE 1931 software. The CRI and color purity were calculated by color calculator software. All the measurements have been carried out at room temperature (RT).

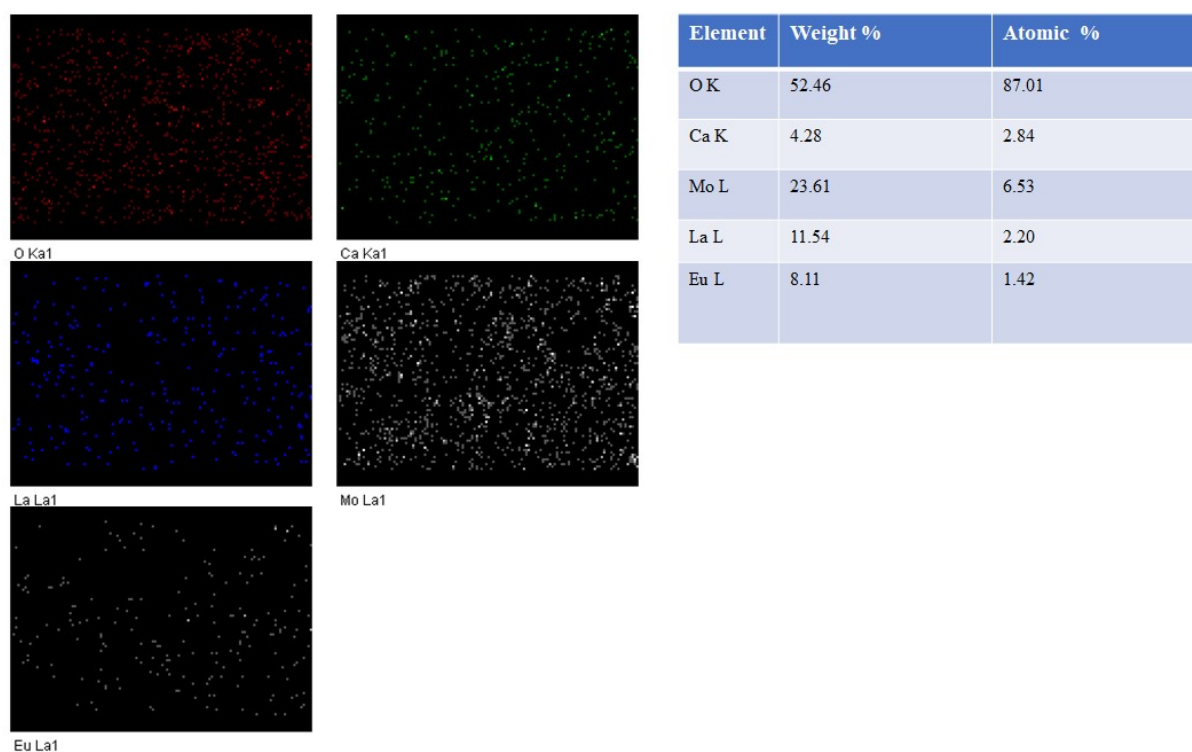

**Figure. S1** Elemental mapping of the LCLM: Eu<sup>3+</sup> phosphor.

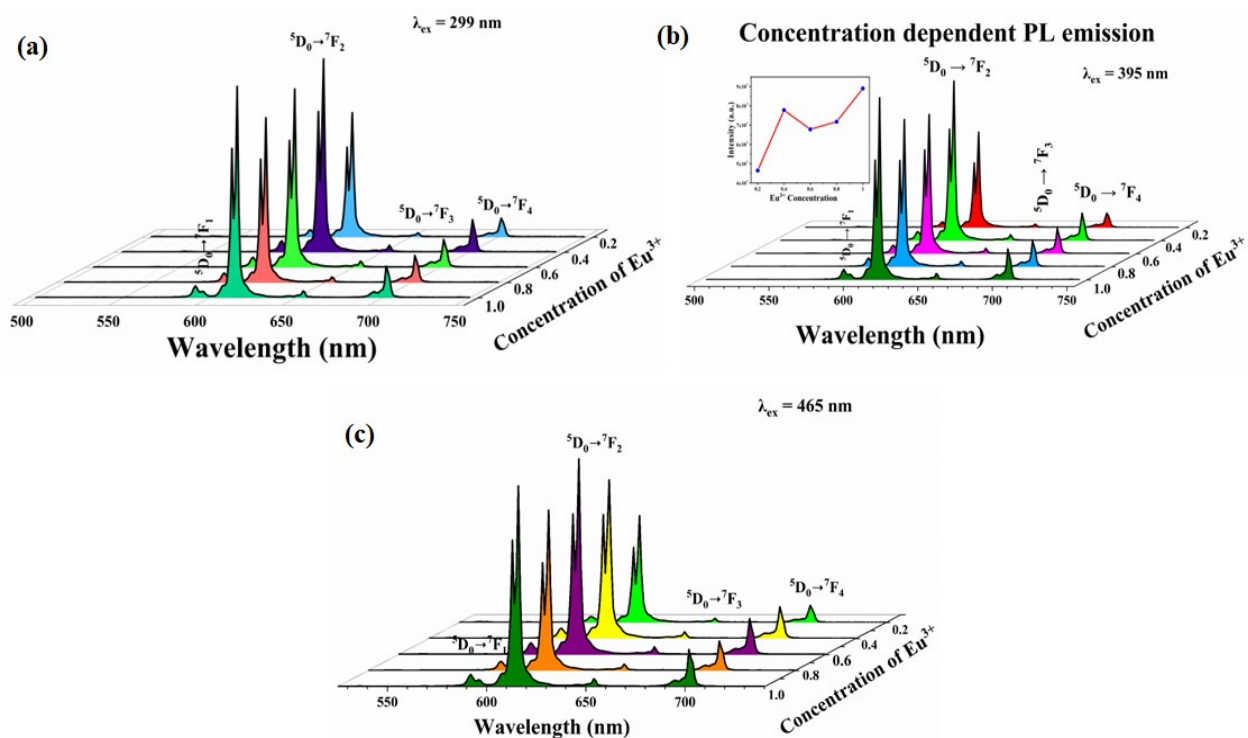

**Figure. S2** PL emission spectra of LCLM: Eu<sup>3+</sup> phosphor excited at (a) CT band, (b) 395 nm, (c) 465nm

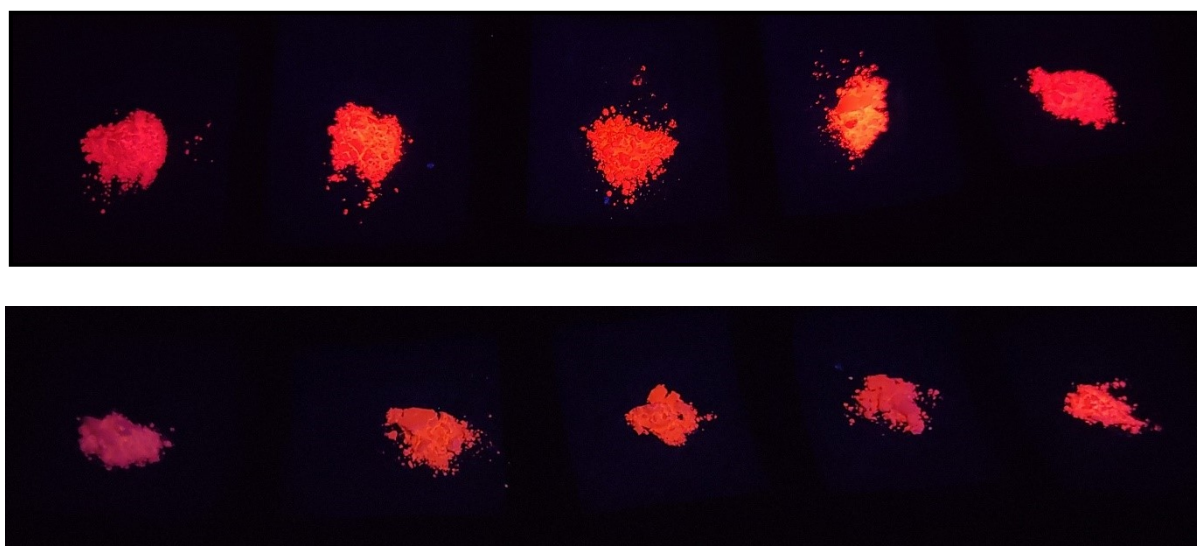

**Figure S3.** The digital photographs of phosphors with a) different Eu concentrations (top), b) Eu<sup>3+</sup>, Sm<sup>3+</sup> doped (bottom), under UV lamp

**Table ST1** Judd – Ofelt Parameters of LCLM: Eu<sup>3+</sup> phosphor at excitation 395 nm

| Concentration<br>of Eu <sup>3+</sup> | <u>Judd - Ofelt Parameter</u>                       |                                                     | A <sub>0-1</sub> in S <sup>-1</sup> | A <sub>0-2</sub> in S <sup>-1</sup> | A <sub>0-4</sub> in S <sup>-1</sup> |
|--------------------------------------|-----------------------------------------------------|-----------------------------------------------------|-------------------------------------|-------------------------------------|-------------------------------------|
|                                      | Ω <sub>2</sub> (10 <sup>-19</sup> cm <sup>2</sup> ) | Ω <sub>4</sub> (10 <sup>-20</sup> cm <sup>2</sup> ) |                                     |                                     |                                     |
| 0.2                                  | 1.142                                               | 4.118                                               | 50                                  | 945.570957                          | 162.61501                           |
| 0.4                                  | 1.1461                                              | 4.726                                               | 50                                  | 948.9931                            | 186.6095                            |
| 0.6                                  | 1.0327                                              | 4.541                                               | 50                                  | 858.8294                            | 179.3121                            |
| 0.8                                  | 1.0619                                              | 4.464                                               | 50                                  | 883.2060                            | 176.4454                            |
| 1.0                                  | 1.0987                                              | 4.494                                               | 50                                  | 916.4249                            | 177.4183                            |

**Table ST2** Judd – Ofelt Parameters of LCLM: Eu<sup>3+</sup> phosphor at excitation 300 nm.

| Concentration<br>of Eu <sup>3+</sup> | <u>Judd - Ofelt Parameter</u>                       |                                                     | A <sub>0-1</sub> in S <sup>-1</sup> | A <sub>0-2</sub> in S <sup>-1</sup> | A <sub>0-4</sub> in S <sup>-1</sup> |
|--------------------------------------|-----------------------------------------------------|-----------------------------------------------------|-------------------------------------|-------------------------------------|-------------------------------------|
|                                      | Ω <sub>2</sub> (10 <sup>-19</sup> cm <sup>2</sup> ) | Ω <sub>4</sub> (10 <sup>-20</sup> cm <sup>2</sup> ) |                                     |                                     |                                     |
| 0.2                                  | 1.1413                                              | 4.137                                               | 50                                  | 945.0024713                         | 163.361402                          |
| 0.4                                  | 1.083                                               | 4.375                                               | 50                                  | 900.692474                          | 172.769584                          |
| 0.6                                  | 1.1282                                              | 4.236                                               | 50                                  | 938.3238228                         | 167.456781                          |
| 0.8                                  | 1.1007                                              | 4.369                                               | 50                                  | 918.080566                          | 172.480643                          |
| 1.0                                  | 1.1274                                              | 4.037                                               | 50                                  | 940.4017036                         | 159.395237                          |

**Table ST3 Judd – Ofelt Parameters of LCLM: Eu<sup>3+</sup> phosphor and its comparison with other reported Eu<sup>3+</sup> activated molybdate phosphor.**

| Material                                                                                | Judd - Ofelt Parameter                          |                                                 | Asymmetry ratio | References |
|-----------------------------------------------------------------------------------------|-------------------------------------------------|-------------------------------------------------|-----------------|------------|
|                                                                                         | $\Omega_2$ (10 <sup>-19</sup> cm <sup>2</sup> ) | $\Omega_4$ (10 <sup>-20</sup> cm <sup>2</sup> ) |                 |            |
| LCLM:Eu <sup>3+</sup>                                                                   | 1.1461                                          | 4.726                                           | 18.27           | This work  |
| La <sub>2</sub> (MoO <sub>4</sub> ) <sub>3</sub> :Eu <sup>3+</sup>                      | 0.962                                           | 1.56                                            | 6.55            | (26)       |
| CaGd(WO <sub>4</sub> ) <sub>3</sub> :Eu <sup>3+</sup>                                   | 0.679                                           | 0.79                                            | 6.75            | (27)       |
| Sr <sub>2</sub> ZnW <sub>1-x</sub> MoxO <sub>6</sub> :Eu <sup>3+</sup> ,Li <sup>+</sup> | 0.514                                           | 0.12                                            | 4.75            | (28)       |

**Table ST4 CIE coordinates, Color purity and Asymmetry ratio of LCLM: Eu<sup>3+</sup> phosphor calculated at ED transition.**

| Eu <sup>3+</sup> Concentration | CIE coordinates (x, y) | Color purity | Asymmetry ratio |
|--------------------------------|------------------------|--------------|-----------------|
| 0.2                            | 0.6617, 0.3376         | 95.2%        | 18.20           |
| 0.4                            | 0.6657, 0.3338         | 96.2%        | 18.27           |
| 0.6                            | 0.6672, 0.3323         | 96.6%        | 16.56           |
| 0.8                            | 0.6685, 0.3311         | 96.9%        | 17.05           |
| 1.0                            | 0.6690, 0.3306         | 97.1%        | 17.68           |

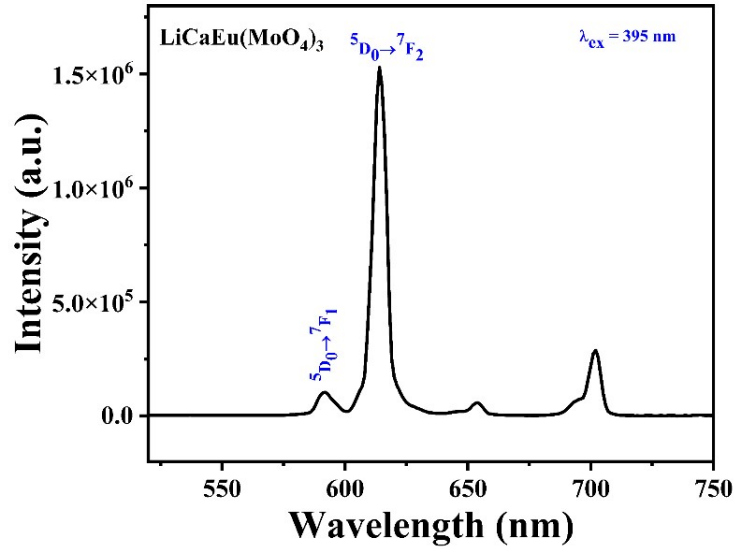

**Figure S4.** Quantum yield calculation for fully doped  $\text{Eu}^{3+}$  phosphor

**Table ST5.** The reported phosphors with their activation energy

| S.No | Phosphor compositions                                          | Activation energy $\Delta E_a$ (eV) | Reference |
|------|----------------------------------------------------------------|-------------------------------------|-----------|
| 1    | $\text{CaB}_2\text{Si}_2\text{O}_8$                            | 0.195                               | 1         |
| 2    | $\text{Ba}_2\text{LiGa}(\text{P}_2\text{O}_7)_2$               | 0.238                               | 2         |
| 3    | $\text{Li}_3\text{Ba}_2\text{La}_3(\text{WO}_4)_8$             | 0.24                                | 3         |
| 4    | $\text{Li}_3\text{BaSrY}_{0.3}\text{Eu}_{2.7}(\text{MoO}_4)_8$ | 0.35                                | 4a        |
| 5    | $\text{LiCaEu}(\text{MoO}_4)_3$                                | 0.40                                | This work |

**Table ST6.** The reported phosphors with their color purity

| S.No | Phosphor compositions                                          | Color purity (%) | Reference |
|------|----------------------------------------------------------------|------------------|-----------|
| 1    | $\text{NaSrY}(\text{MoO}_4)_3:\text{Eu}^{3+}$                  | 93.6             | 4b        |
| 2    | $\text{KBaGd}(\text{MoO}_4)_3:\text{Eu}^{3+}$                  | 94               | 5         |
| 3    | $\text{SrMoO}_4:\text{Eu}^{3+}$                                | 85.8             | 6         |
| 4    | $\text{CaMo}_{0.6}\text{W}_{0.4}\text{O}_4:\text{Eu}^{3+}$     | 93.8             | 7         |
| 5    | $\text{NaBiF}_4:\text{Eu}^{3+}$                                | 90.2             | 8         |
| 6    | $\text{Li}_3\text{BaSrY}_{0.3}\text{Eu}_{2.7}(\text{MoO}_4)_8$ | 95.7             | 4a        |
| 7    | $\text{LiCaEu}(\text{MoO}_4)_3$                                | 97               | This work |

**Table ST7. The reported red phosphors emission peaking wavelength and FWHM**

| S. No | Red phosphors                                                                           | Emission peaking wavelength (nm) | CIE color coordinates (x,y) | FWHM (nm) | Ref       |
|-------|-----------------------------------------------------------------------------------------|----------------------------------|-----------------------------|-----------|-----------|
| 1     | CaS:Eu <sup>2+</sup>                                                                    | 647.8                            | (0.689, 0.311)              | 74.2      | 9         |
| 2     | SrS:Eu <sup>2+</sup>                                                                    | 609                              | (0.608, 0.391)              | 82        | 10-12     |
| 3     | Sr <sub>2</sub> Si <sub>5</sub> N <sub>8</sub> :Eu <sup>2+</sup>                        | 617.8                            | (0.619, 0.301)              | 94.2      | 13-19     |
| 4     | CaAlSiN <sub>3</sub> :Eu <sup>2+</sup>                                                  | 650                              | (0.664, 0.336)              | 92.4      | 20-24     |
| 5     | (Sr,Ca)AlSiN <sub>3</sub> :Eu <sup>2+</sup>                                             | 659                              | (0.648, 0.352)              | 126       | 25        |
| 6     | Li <sub>3</sub> BaSrY <sub>0.3</sub> Eu <sub>2.7</sub> (MoO <sub>4</sub> ) <sub>8</sub> | 615                              | (0.660, 0.339)              | 6.24      | 4a        |
| 7     | LiCaEu(MoO <sub>4</sub> ) <sub>3</sub>                                                  | 615                              | (0.670,0.331)               | 6         | This work |

**Experimental section of yellow organic dye:**

Aldehyde (1.831 mmol, 1 eq.) and NaOH (1.831 mmol, 1 eq.) were added to a mixture of 30 mL of water and 25 mL of ethanol, and then 1-phenylethanone (3.663 mmol, 2 eq.) was added. The mixture was heated and stirred at 90 °C for 4 hours. After cooling, the mixture was filtered and washed with plenty of water and then dried at RT to produce a yellow powder with a yield of 80%. The synthetic scheme for the preparation of the yellow dye is shown below.

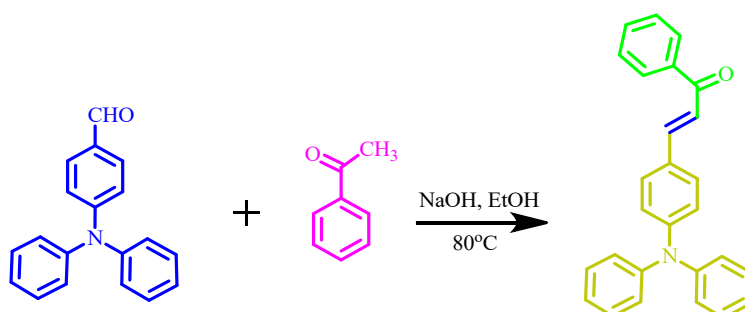

**Scheme 1.** Synthesis of TPA substituted yellow organic dye.

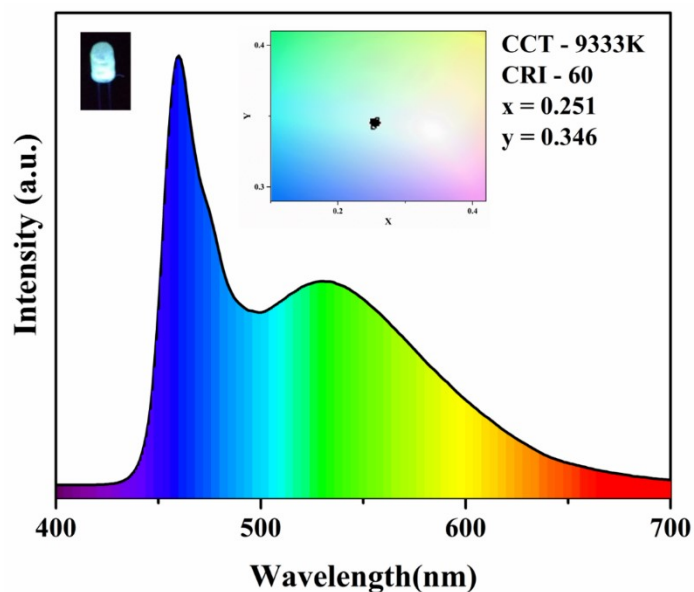

**Fig. S5** EL spectrum of white LED by using blue LED with yellow organic dye.

## References

1. X. Liu, B. Shen, B. Chen, Y. Zhang and J. Hu, *Optical Materials*, 2019, **96**, 109353.
2. Y. N. Li, D. Zhao, R. J. Zhang, F. F. Li, L. Y. Shi, Q. X. Yao, X. Y. Han and X. Q. Cui, *Dalton Transactions*, 2019, **48**, 13780–13788.
3. J. Hu, X. Gong, J. Huang, Y. Chen, Y. Lin, Z. Luo and Y. Huang, *Optical Materials Express*, 2016, **6**, 181–190.
4. a) Kasturi Singh, Marikumar Rajendran, Rachna Devi and Sivakumar Vaidyanathan, *Inorg. Chem.* 2022, 61, 6, 2768–2782, b) Marikumar Rajendran and Sivakumar Vaidyanathan, *Dalton Trans.*, 2020, 49, 9239-9253
5. M. Song, L. Wang, Y. Feng, H. Wang, X. Wang and D. Li, *Optical Materials*, 2018, **84**, 284–291.
6. X. Huang, B. Li, H. Guo and D. Chen, *Dye. Pigment.*, 2017, **143**, 86–94.
7. P. Du and J. S. Yu, *RSC Adv.*, 2015, **5**, 60121–60127.



8. P. Du, X. Huang and J. S. Yu, *Chemical Engineering Journal*, 2018, 337, 91-100
9. P. F. Smet, A. B. Parmentier and D. Poelman, *J. Electrochem. Soc.*, 2011, **158**, R37–R54
10. Y. Hu, W. Zhuang, H. Ye, S. Zhang, Y. Fang and X. Huang, *J. Lumin.*, 2005, **111**, 139–145
11. H. Wu, X. Zhang, C. Guo, J. Xu, M. Wu and Q. Su, *IEEE Photonics Technol. Lett.*, 2005, **17**, 1160–1162
12. L. Wondraczek, M. Batentschuk, M. A. Schmidt, R. Borchardt, S. Scheiner, B. Seemann, P. Schweizer and C. J. Brabec, *Nat. Commun.*, 2013, **4**, 2047
13. R.-J. Xie and N. Hirosaki, *Sci. Technol. Adv. Mater.*, 2007, **8**, 588–600
14. H. A. Höpfe, H. Lutz, P. Morys, W. Schnick and A. Seilmeier, *J. Phys. Chem. Solids*, 2000, **61**, 2001–2006
15. T. Horikawa, X. Q. Piao, M. Fujitani, H. Hanzawa and K. Machida, *IOP Conference Series: Materials Science and Engineering*, 2009, **1**, 012024
16. R. Mueller-Mach, G. Mueller, M. R. Krames, H. A. Höpfe, F. Stadler, W. Schnick, T. Juestel and P. Schmidt, *Phys. Status Solidi A*, 2005, **202**, 1727–1732
17. X. Piao, T. Horikawa, H. Hanzawa and K. Machida, *Appl. Phys. Lett.*, 2006, **88**, 161908
18. X. Piao, K. Machida, T. Horikawa and H. Hanzawa, *Appl. Phys. Lett.*, 2007, **91**, 041908
19. M. Zeuner, P. J. Schmidt and W. Schnick, *Chem. Mater.*, 2009, **21**, 2467–2473
20. Z. Wang, B. Shen, F. Dong, S. Wang and W.-S. Su, *Phys. Chem. Chem. Phys.*, 2015, **17**, 15065–15070
21. K. Uheda, N. Hirosaki and H. Yamamoto, *Phys. Status Solidi A*, 2006, **203**, 2712–2717
22. K. Uheda, N. Hirosaki, Y. Yamamoto, A. Naito, T. Nakajima and H. Yamamoto, *Electrochem. Solid-State Lett.*, 2006, **9**, H22–H25
23. C. C. Yang, C. M. Lin, Y. J. Chen, Y. T. Wu, S. R. Chuang, R. S. Liu and S. F. Hu, *Appl. Phys. Lett.*, 2007, **90**, 123503

24. X. Piao, K. Machida, T. Horikawa, H. Hanzawa, Y. Shimomura and N. Kijima, *Chem. Mater.*, 2007, **19**, 4592–4599
25. H. Watanabe and N. Kijima, *J. Alloys Compd.*, 2009, **475**, 434–439
26. K. Thomas, D. Alexander, K. P. Mani, S. Gopi, S. Ajeesh Kumar, P. R. Biju, N. V Unnikrishnan and C. Joseph, *Journal of Physics and Chemistry of Solids*, 2020, **137**, 109212.
27. G. Li, Y. Wei, Z. Li and G. Xu, *Opt Mater (Amst)*, 2017, **66**, 253–260.
28. L. Li, Y. Pan, X. Zhou, C. Zhao, Y. Wang, S. Jiang, A. Suchocki and M. G. Brik, *J Alloys Compd*, 2016, **685**, 917–926.
